# Supplementary material
Source: publisher figshare collection journal article supplement (https://acs.figshare.com/ndownloader/files/5339176)
Supplement: Supplementary file 1 [file 5339176]

 
data_p21n 
 
_audit_creation_method            SHELXL-97 
_chemical_name_systematic 
; 
 ? 
; 
_chemical_name_common             ? 
_chemical_melting_point           ? 
_chemical_formula_moiety          ? 
_chemical_formula_sum 
 'C18 H18 N2 O2 S2' 
_chemical_formula_weight          358.46 
 
loop_ 
 _atom_type_symbol 
 _atom_type_description 
 _atom_type_scat_dispersion_real 
 _atom_type_scat_dispersion_imag 
 _atom_type_scat_source 
 'C'  'C'   0.0033   0.0016 
 'International Tables Vol C Tables 4.2.6.8 and 6.1.1.4' 
 'H'  'H'   0.0000   0.0000 
 'International Tables Vol C Tables 4.2.6.8 and 6.1.1.4' 
 'N'  'N'   0.0061   0.0033 
 'International Tables Vol C Tables 4.2.6.8 and 6.1.1.4' 
 'O'  'O'   0.0106   0.0060 
 'International Tables Vol C Tables 4.2.6.8 and 6.1.1.4' 
 'S'  'S'   0.1246   0.1234 
 'International Tables Vol C Tables 4.2.6.8 and 6.1.1.4' 
 
_symmetry_cell_setting            monoclinic
_symmetry_space_group_name_H-M    P2(1)/n 
 
loop_ 
 _symmetry_equiv_pos_as_xyz 
 'x, y, z' 
 '-x+1/2, y+1/2, -z+1/2' 
 '-x, -y, -z' 
 'x-1/2, -y-1/2, z-1/2' 
 
_cell_length_a                    17.056(2) 
_cell_length_b                    3.9938(5) 
_cell_length_c                    23.829(3) 
_cell_angle_alpha                 90.00 
_cell_angle_beta                  98.490(12) 
_cell_angle_gamma                 90.00 
_cell_volume                      1605.4(3) 
_cell_formula_units_Z             4 
_cell_measurement_temperature     113(2) 
_cell_measurement_reflns_used     2924
_cell_measurement_theta_min       2.6 
_cell_measurement_theta_max       36.7
 
_exptl_crystal_description        prism
_exptl_crystal_colour             pale-orange 
_exptl_crystal_size_max           0.316 
_exptl_crystal_size_mid           0.281
_exptl_crystal_size_min           0.225 
_exptl_crystal_density_meas       ? 
_exptl_crystal_density_diffrn     1.483 
_exptl_crystal_density_method     'not measured' 
_exptl_crystal_F_000              752 
_exptl_absorpt_coefficient_mu     0.345 
_exptl_absorpt_correction_type    none
_exptl_absorpt_correction_T_min   ? 
_exptl_absorpt_correction_T_max   ? 
_exptl_absorpt_process_details    ? 
 
_exptl_special_details 
; 
 ? 
; 
 
_diffrn_ambient_temperature       113(2) 
_diffrn_radiation_wavelength      0.71073 
_diffrn_radiation_type            MoK\a 
_diffrn_radiation_source          'fine-focus sealed tube' 
_diffrn_radiation_monochromator   graphite 
_diffrn_measurement_device_type   'Sapphire2-CCD, Oxford Diffraction'
_diffrn_measurement_method        '373 images at 1.0 deg. in \w and 15 sec.'
_diffrn_detector_area_resol_mean  ? 
_diffrn_standards_number          ? 
_diffrn_standards_interval_count  ? 
_diffrn_standards_interval_time   ? 
_diffrn_standards_decay_%         ? 
_diffrn_reflns_number             8141 
_diffrn_reflns_av_R_equivalents   0.0369 
_diffrn_reflns_av_sigmaI/netI     0.0515 
_diffrn_reflns_limit_h_min        -20 
_diffrn_reflns_limit_h_max        20 
_diffrn_reflns_limit_k_min        -4 
_diffrn_reflns_limit_k_max        4 
_diffrn_reflns_limit_l_min        -28 
_diffrn_reflns_limit_l_max        28 
_diffrn_reflns_theta_min          3.46 
_diffrn_reflns_theta_max          25.25 
_reflns_number_total              2892 
_reflns_number_gt                 2084 
_reflns_threshold_expression      >2sigma(I) 
 
_computing_data_collection        'CrysAlis CCD 1.171.32, Oxford Diffraction'
_computing_cell_refinement        'CrysAlis RED 1.171.32, Oxford Diffraction' 
_computing_data_reduction         'CrysAlis RED 1.171.32, Oxford Diffraction' 
_computing_structure_solution     'SHELXS-97 (Sheldrick, 1990)' 
_computing_structure_refinement   'SHELXL-97 (Sheldrick, 1997)' 
_computing_molecular_graphics     'SHELXL-97'
_computing_publication_material   'SHELXL-97' 
 
_refine_special_details 
; 
 Refinement of F^2^ against ALL reflections.  The weighted R-factor wR and 
 goodness of fit S are based on F^2^, conventional R-factors R are based 
 on F, with F set to zero for negative F^2^. The threshold expression of 
 F^2^ > 2sigma(F^2^) is used only for calculating R-factors(gt) etc. and is 
 not relevant to the choice of reflections for refinement.  R-factors based 
 on F^2^ are statistically about twice as large as those based on F, and R- 
 factors based on ALL data will be even larger. 
; 
 
_refine_ls_structure_factor_coef  Fsqd  
_refine_ls_matrix_type            full 
_refine_ls_weighting_scheme       calc  
_refine_ls_weighting_details 
 'calc w=1/[\s^2^(Fo^2^)+(0.0452P)^2^+0.0000P] where P=(Fo^2^+2Fc^2^)/3' 
_atom_sites_solution_primary      direct 
_atom_sites_solution_secondary    difmap 
_atom_sites_solution_hydrogens    geom 
_refine_ls_hydrogen_treatment     mixed 
_refine_ls_extinction_method      none 
_refine_ls_extinction_coef        ? 
_refine_ls_number_reflns          2892 
_refine_ls_number_parameters      224 
_refine_ls_number_restraints      2 
_refine_ls_R_factor_all           0.0542 
_refine_ls_R_factor_gt            0.0354 
_refine_ls_wR_factor_ref          0.0846 
_refine_ls_wR_factor_gt           0.0803 
_refine_ls_goodness_of_fit_ref    0.926 
_refine_ls_restrained_S_all       0.926 
_refine_ls_shift/su_max           0.006 
_refine_ls_shift/su_mean          0.000 
 
loop_ 
 _atom_site_label 
 _atom_site_type_symbol 
 _atom_site_fract_x 
 _atom_site_fract_y 
 _atom_site_fract_z 
 _atom_site_U_iso_or_equiv 
 _atom_site_adp_type 
 _atom_site_occupancy 
 _atom_site_symetry_multiplicity 
 _atom_site_calc_flag 
 _atom_site_refinement_flags 
 _atom_site_disorder_assembly 
 _atom_site_disorder_group 
S01 S 0.64820(3) -0.09004(15) 0.06375(2) 0.01903(16) Uani 1 1 d . . . 
C02 C 0.74185(12) 0.0883(6) 0.08601(9) 0.0172(5) Uani 1 1 d . . . 
C03 C 0.75159(12) 0.1882(6) 0.14139(9) 0.0188(5) Uani 1 1 d . . . 
H03 H 0.7983 0.2888 0.1608 0.023 Uiso 1 1 calc R . . 
C03A C 0.68226(12) 0.1211(6) 0.16606(9) 0.0185(5) Uani 1 1 d . . . 
S04 S 0.65675(3) 0.20256(16) 0.23290(2) 0.02049(16) Uani 1 1 d . . . 
C04A C 0.56321(12) 0.0304(6) 0.21223(9) 0.0180(5) Uani 1 1 d . . . 
C04B C 0.50213(13) -0.0018(6) 0.24691(9) 0.0203(5) Uani 1 1 d . . . 
C05 C 0.50807(13) 0.1096(6) 0.30367(9) 0.0251(6) Uani 1 1 d . . . 
H05 H 0.5555 0.2136 0.3213 0.030 Uiso 1 1 calc R . . 
C06 C 0.44601(14) 0.0689(7) 0.33341(10) 0.0288(6) Uani 1 1 d . . . 
H06 H 0.4504 0.1461 0.3715 0.035 Uiso 1 1 calc R . . 
C07 C 0.37591(15) -0.0864(7) 0.30792(10) 0.0295(6) Uani 1 1 d . . . 
H07 H 0.3334 -0.1166 0.3291 0.035 Uiso 1 1 calc R . . 
C08 C 0.36798(13) -0.1952(6) 0.25280(10) 0.0271(6) Uani 1 1 d . . . 
H08 H 0.3200 -0.2981 0.2360 0.033 Uiso 1 1 calc R . . 
C08A C 0.43103(13) -0.1547(6) 0.22073(9) 0.0210(5) Uani 1 1 d . . . 
N09 N 0.41995(10) -0.2668(5) 0.16515(7) 0.0221(4) Uani 1 1 d . . . 
C10 C 0.47785(12) -0.2344(6) 0.13433(9) 0.0188(5) Uani 1 1 d . . . 
C10A C 0.55155(12) -0.0851(6) 0.15631(9) 0.0170(5) Uani 1 1 d . . . 
C10B C 0.62160(12) -0.0266(6) 0.13083(9) 0.0182(5) Uani 1 1 d . . . 
C11 C 0.46363(13) -0.3599(6) 0.07426(9) 0.0249(6) Uani 1 1 d . . . 
H11A H 0.4123 -0.4743 0.0672 0.037 Uiso 1 1 calc R . . 
H11B H 0.5058 -0.5168 0.0683 0.037 Uiso 1 1 calc R . . 
H11C H 0.4635 -0.1705 0.0481 0.037 Uiso 1 1 calc R . . 
N12 N 0.79730(10) 0.0922(5) 0.04847(7) 0.0181(4) Uani 1 1 d . . . 
C13 C 0.87296(12) 0.2522(6) 0.07072(9) 0.0207(5) Uani 1 1 d . . . 
H13A H 0.8933 0.1593 0.1086 0.025 Uiso 1 1 calc R . . 
H13B H 0.8649 0.4959 0.0749 0.025 Uiso 1 1 calc R . . 
C14 C 0.93221(12) 0.1912(6) 0.03078(9) 0.0231(5) Uani 1 1 d . . . 
H14A H 0.9825 0.3062 0.0454 0.028 Uiso 1 1 calc R . . 
H14B H 0.9432 -0.0517 0.0293 0.028 Uiso 1 1 calc R . . 
O15 O 0.90408(8) 0.3092(4) -0.02505(6) 0.0239(4) Uani 1 1 d . . . 
C16 C 0.83292(12) 0.1354(6) -0.04724(9) 0.0238(5) Uani 1 1 d . . . 
H16A H 0.8442 -0.1072 -0.0491 0.029 Uiso 1 1 calc R . . 
H16B H 0.8141 0.2147 -0.0863 0.029 Uiso 1 1 calc R . . 
C17 C 0.76853(12) 0.1908(6) -0.01067(8) 0.0213(5) Uani 1 1 d . . . 
H17A H 0.7530 0.4298 -0.0119 0.026 Uiso 1 1 calc R . . 
H17B H 0.7212 0.0564 -0.0256 0.026 Uiso 1 1 calc R . . 
O1 O 0.29345(11) 0.2833(6) 0.12436(9) 0.0432(5) Uani 1 1 d D . . 
H1A H 0.3312(12) 0.409(6) 0.1352(12) 0.052 Uiso 1 1 d D . . 
H1B H 0.3132(16) 0.107(4) 0.1381(12) 0.052 Uiso 1 1 d D . . 
 
loop_ 
 _atom_site_aniso_label 
 _atom_site_aniso_U_11 
 _atom_site_aniso_U_22 
 _atom_site_aniso_U_33 
 _atom_site_aniso_U_23 
 _atom_site_aniso_U_13 
 _atom_site_aniso_U_12 
S01 0.0173(3) 0.0252(4) 0.0150(3) -0.0012(2) 0.0036(2) -0.0011(2) 
C02 0.0180(11) 0.0143(12) 0.0193(12) 0.0032(10) 0.0028(9) 0.0021(10) 
C03 0.0164(11) 0.0203(13) 0.0192(11) 0.0020(10) 0.0017(9) 0.0000(10) 
C03A 0.0195(11) 0.0198(14) 0.0160(11) 0.0012(10) 0.0025(9) 0.0019(10) 
S04 0.0197(3) 0.0268(4) 0.0149(3) -0.0022(3) 0.0022(2) -0.0016(3) 
C04A 0.0179(11) 0.0169(13) 0.0189(12) 0.0026(10) 0.0017(9) 0.0022(10) 
C04B 0.0228(11) 0.0213(14) 0.0170(12) 0.0013(10) 0.0039(9) 0.0054(10) 
C05 0.0247(12) 0.0289(15) 0.0215(12) -0.0013(11) 0.0031(10) 0.0029(11) 
C06 0.0334(14) 0.0361(16) 0.0182(12) -0.0003(11) 0.0078(11) 0.0088(12) 
C07 0.0314(13) 0.0334(16) 0.0266(14) 0.0042(12) 0.0144(11) 0.0063(12) 
C08 0.0197(11) 0.0339(16) 0.0289(13) 0.0038(12) 0.0076(10) 0.0016(11) 
C08A 0.0208(11) 0.0216(13) 0.0208(12) 0.0018(10) 0.0041(10) 0.0023(10) 
N09 0.0203(10) 0.0264(12) 0.0200(10) 0.0001(9) 0.0045(8) 0.0010(9) 
C10 0.0185(11) 0.0187(13) 0.0191(11) 0.0025(10) 0.0029(9) 0.0034(10) 
C10A 0.0168(11) 0.0167(13) 0.0171(11) 0.0028(10) 0.0014(9) 0.0037(10) 
C10B 0.0181(11) 0.0212(13) 0.0155(11) 0.0028(10) 0.0028(9) 0.0031(10) 
C11 0.0229(12) 0.0314(15) 0.0203(12) -0.0020(11) 0.0023(10) -0.0036(11) 
N12 0.0164(9) 0.0206(11) 0.0181(10) 0.0027(8) 0.0052(8) 0.0008(8) 
C13 0.0161(11) 0.0242(14) 0.0217(12) 0.0005(10) 0.0026(9) -0.0018(10) 
C14 0.0187(11) 0.0237(14) 0.0273(12) 0.0033(11) 0.0042(10) -0.0003(10) 
O15 0.0224(8) 0.0257(10) 0.0249(8) 0.0036(8) 0.0073(7) -0.0036(7) 
C16 0.0229(12) 0.0281(15) 0.0217(12) 0.0010(11) 0.0074(10) -0.0015(11) 
C17 0.0186(11) 0.0267(14) 0.0185(11) 0.0022(11) 0.0027(9) -0.0002(10) 
O1 0.0332(11) 0.0452(14) 0.0488(12) 0.0032(11) -0.0026(9) -0.0036(10) 
 
_geom_special_details 
; 
 All esds (except the esd in the dihedral angle between two l.s. planes) 
 are estimated using the full covariance matrix.  The cell esds are taken 
 into account individually in the estimation of esds in distances, angles 
 and torsion angles; correlations between esds in cell parameters are only 
 used when they are defined by crystal symmetry.  An approximate (isotropic) 
 treatment of cell esds is used for estimating esds involving l.s. planes. 
; 
 
loop_ 
 _geom_bond_atom_site_label_1 
 _geom_bond_atom_site_label_2 
 _geom_bond_distance 
 _geom_bond_site_symmetry_2 
 _geom_bond_publ_flag 
S01 C10B 1.743(2) . ? 
S01 C02 1.758(2) . ? 
C02 C03 1.365(3) . ? 
C02 N12 1.394(2) . ? 
C03 C03A 1.421(3) . ? 
C03A C10B 1.366(3) . ? 
C03A S04 1.743(2) . ? 
S04 C04A 1.740(2) . ? 
C04A C10A 1.396(3) . ? 
C04A C04B 1.428(3) . ? 
C04B C05 1.413(3) . ? 
C04B C08A 1.417(3) . ? 
C05 C06 1.367(3) . ? 
C06 C07 1.403(3) . ? 
C07 C08 1.371(3) . ? 
C08 C08A 1.417(3) . ? 
C08A N09 1.384(3) . ? 
N09 C10 1.321(2) . ? 
C10 C10A 1.420(3) . ? 
C10 C11 1.502(3) . ? 
C10A C10B 1.437(3) . ? 
N12 C13 1.467(3) . ? 
N12 C17 1.476(3) . ? 
C13 C14 1.507(3) . ? 
C14 O15 1.426(3) . ? 
O15 C16 1.430(3) . ? 
C16 C17 1.516(3) . ? 
 
loop_ 
 _geom_angle_atom_site_label_1 
 _geom_angle_atom_site_label_2 
 _geom_angle_atom_site_label_3 
 _geom_angle 
 _geom_angle_site_symmetry_1 
 _geom_angle_site_symmetry_3 
 _geom_angle_publ_flag 
C10B S01 C02 90.71(10) . . ? 
C03 C02 N12 128.3(2) . . ? 
C03 C02 S01 112.67(15) . . ? 
N12 C02 S01 118.89(16) . . ? 
C02 C03 C03A 110.8(2) . . ? 
C10B C03A C03 115.34(18) . . ? 
C10B C03A S04 111.94(15) . . ? 
C03 C03A S04 132.68(17) . . ? 
C04A S04 C03A 90.55(10) . . ? 
C10A C04A C04B 120.6(2) . . ? 
C10A C04A S04 113.34(15) . . ? 
C04B C04A S04 126.04(17) . . ? 
C05 C04B C08A 119.51(19) . . ? 
C05 C04B C04A 124.8(2) . . ? 
C08A C04B C04A 115.72(19) . . ? 
C06 C05 C04B 120.5(2) . . ? 
C05 C06 C07 120.2(2) . . ? 
C08 C07 C06 120.8(2) . . ? 
C07 C08 C08A 120.3(2) . . ? 
N09 C08A C04B 123.19(18) . . ? 
N09 C08A C08 118.1(2) . . ? 
C04B C08A C08 118.7(2) . . ? 
C10 N09 C08A 119.50(19) . . ? 
N09 C10 C10A 122.00(19) . . ? 
N09 C10 C11 117.92(19) . . ? 
C10A C10 C11 120.08(18) . . ? 
C04A C10A C10 118.97(18) . . ? 
C04A C10A C10B 109.84(19) . . ? 
C10 C10A C10B 131.2(2) . . ? 
C03A C10B C10A 114.32(18) . . ? 
C03A C10B S01 110.50(15) . . ? 
C10A C10B S01 135.15(18) . . ? 
C02 N12 C13 114.62(17) . . ? 
C02 N12 C17 117.00(16) . . ? 
C13 N12 C17 112.31(16) . . ? 
N12 C13 C14 109.73(17) . . ? 
O15 C14 C13 111.79(17) . . ? 
C14 O15 C16 109.57(16) . . ? 
O15 C16 C17 111.34(18) . . ? 
N12 C17 C16 110.06(17) . . ? 
 
loop_ 
 _geom_torsion_atom_site_label_1 
 _geom_torsion_atom_site_label_2 
 _geom_torsion_atom_site_label_3 
 _geom_torsion_atom_site_label_4 
 _geom_torsion 
 _geom_torsion_site_symmetry_1 
 _geom_torsion_site_symmetry_2 
 _geom_torsion_site_symmetry_3 
 _geom_torsion_site_symmetry_4 
 _geom_torsion_publ_flag 
C10B S01 C02 C03 0.19(18) . . . . ? 
C10B S01 C02 N12 176.12(18) . . . . ? 
N12 C02 C03 C03A -175.8(2) . . . . ? 
S01 C02 C03 C03A -0.3(3) . . . . ? 
C02 C03 C03A C10B 0.3(3) . . . . ? 
C02 C03 C03A S04 -177.19(19) . . . . ? 
C10B C03A S04 C04A 0.43(18) . . . . ? 
C03 C03A S04 C04A 178.0(2) . . . . ? 
C03A S04 C04A C10A -0.08(18) . . . . ? 
C03A S04 C04A C04B 179.1(2) . . . . ? 
C10A C04A C04B C05 -179.4(2) . . . . ? 
S04 C04A C04B C05 1.4(4) . . . . ? 
C10A C04A C04B C08A -0.1(3) . . . . ? 
S04 C04A C04B C08A -179.26(17) . . . . ? 
C08A C04B C05 C06 0.4(4) . . . . ? 
C04A C04B C05 C06 179.7(2) . . . . ? 
C04B C05 C06 C07 0.5(4) . . . . ? 
C05 C06 C07 C08 -1.0(4) . . . . ? 
C06 C07 C08 C08A 0.6(4) . . . . ? 
C05 C04B C08A N09 179.1(2) . . . . ? 
C04A C04B C08A N09 -0.2(3) . . . . ? 
C05 C04B C08A C08 -0.8(3) . . . . ? 
C04A C04B C08A C08 179.9(2) . . . . ? 
C07 C08 C08A N09 -179.6(2) . . . . ? 
C07 C08 C08A C04B 0.3(4) . . . . ? 
C04B C08A N09 C10 0.5(4) . . . . ? 
C08 C08A N09 C10 -179.6(2) . . . . ? 
C08A N09 C10 C10A -0.5(3) . . . . ? 
C08A N09 C10 C11 179.8(2) . . . . ? 
C04B C04A C10A C10 0.2(3) . . . . ? 
S04 C04A C10A C10 179.41(17) . . . . ? 
C04B C04A C10A C10B -179.5(2) . . . . ? 
S04 C04A C10A C10B -0.3(2) . . . . ? 
N09 C10 C10A C04A 0.1(3) . . . . ? 
C11 C10 C10A C04A 179.8(2) . . . . ? 
N09 C10 C10A C10B 179.7(2) . . . . ? 
C11 C10 C10A C10B -0.6(4) . . . . ? 
C03 C03A C10B C10A -178.7(2) . . . . ? 
S04 C03A C10B C10A -0.7(3) . . . . ? 
C03 C03A C10B S01 -0.1(3) . . . . ? 
S04 C03A C10B S01 177.86(12) . . . . ? 
C04A C10A C10B C03A 0.6(3) . . . . ? 
C10 C10A C10B C03A -179.0(2) . . . . ? 
C04A C10A C10B S01 -177.4(2) . . . . ? 
C10 C10A C10B S01 2.9(4) . . . . ? 
C02 S01 C10B C03A -0.03(18) . . . . ? 
C02 S01 C10B C10A 178.1(2) . . . . ? 
C03 C02 N12 C13 -5.9(3) . . . . ? 
S01 C02 N12 C13 178.87(16) . . . . ? 
C03 C02 N12 C17 -140.5(2) . . . . ? 
S01 C02 N12 C17 44.3(3) . . . . ? 
C02 N12 C13 C14 170.66(18) . . . . ? 
C17 N12 C13 C14 -52.6(2) . . . . ? 
N12 C13 C14 O15 57.1(2) . . . . ? 
C13 C14 O15 C16 -61.0(2) . . . . ? 
C14 O15 C16 C17 60.1(2) . . . . ? 
C02 N12 C17 C16 -172.16(19) . . . . ? 
C13 N12 C17 C16 52.2(2) . . . . ? 
O15 C16 C17 N12 -55.7(3) . . . . ? 
 
_diffrn_measured_fraction_theta_max    0.997 
_diffrn_reflns_theta_full              25.25 
_diffrn_measured_fraction_theta_full   0.997 
_refine_diff_density_max    0.301 
_refine_diff_density_min   -0.287 
_refine_diff_density_rms    0.061 
